# Supplementary material for: The evolutionary and functional diversity of classical and lesser-known cytoplasmic and organellar translational GTPases across the tree of life
Source: PubMed Central journal article supplement (PMC4342817; doi:10.1186/s12864-015-1289-7), 2015-02-14
Supplement: 12864_2015_1289_MOESM4_ESM.pdf [file 12864_2015_1289_MOESM4_ESM.pdf]

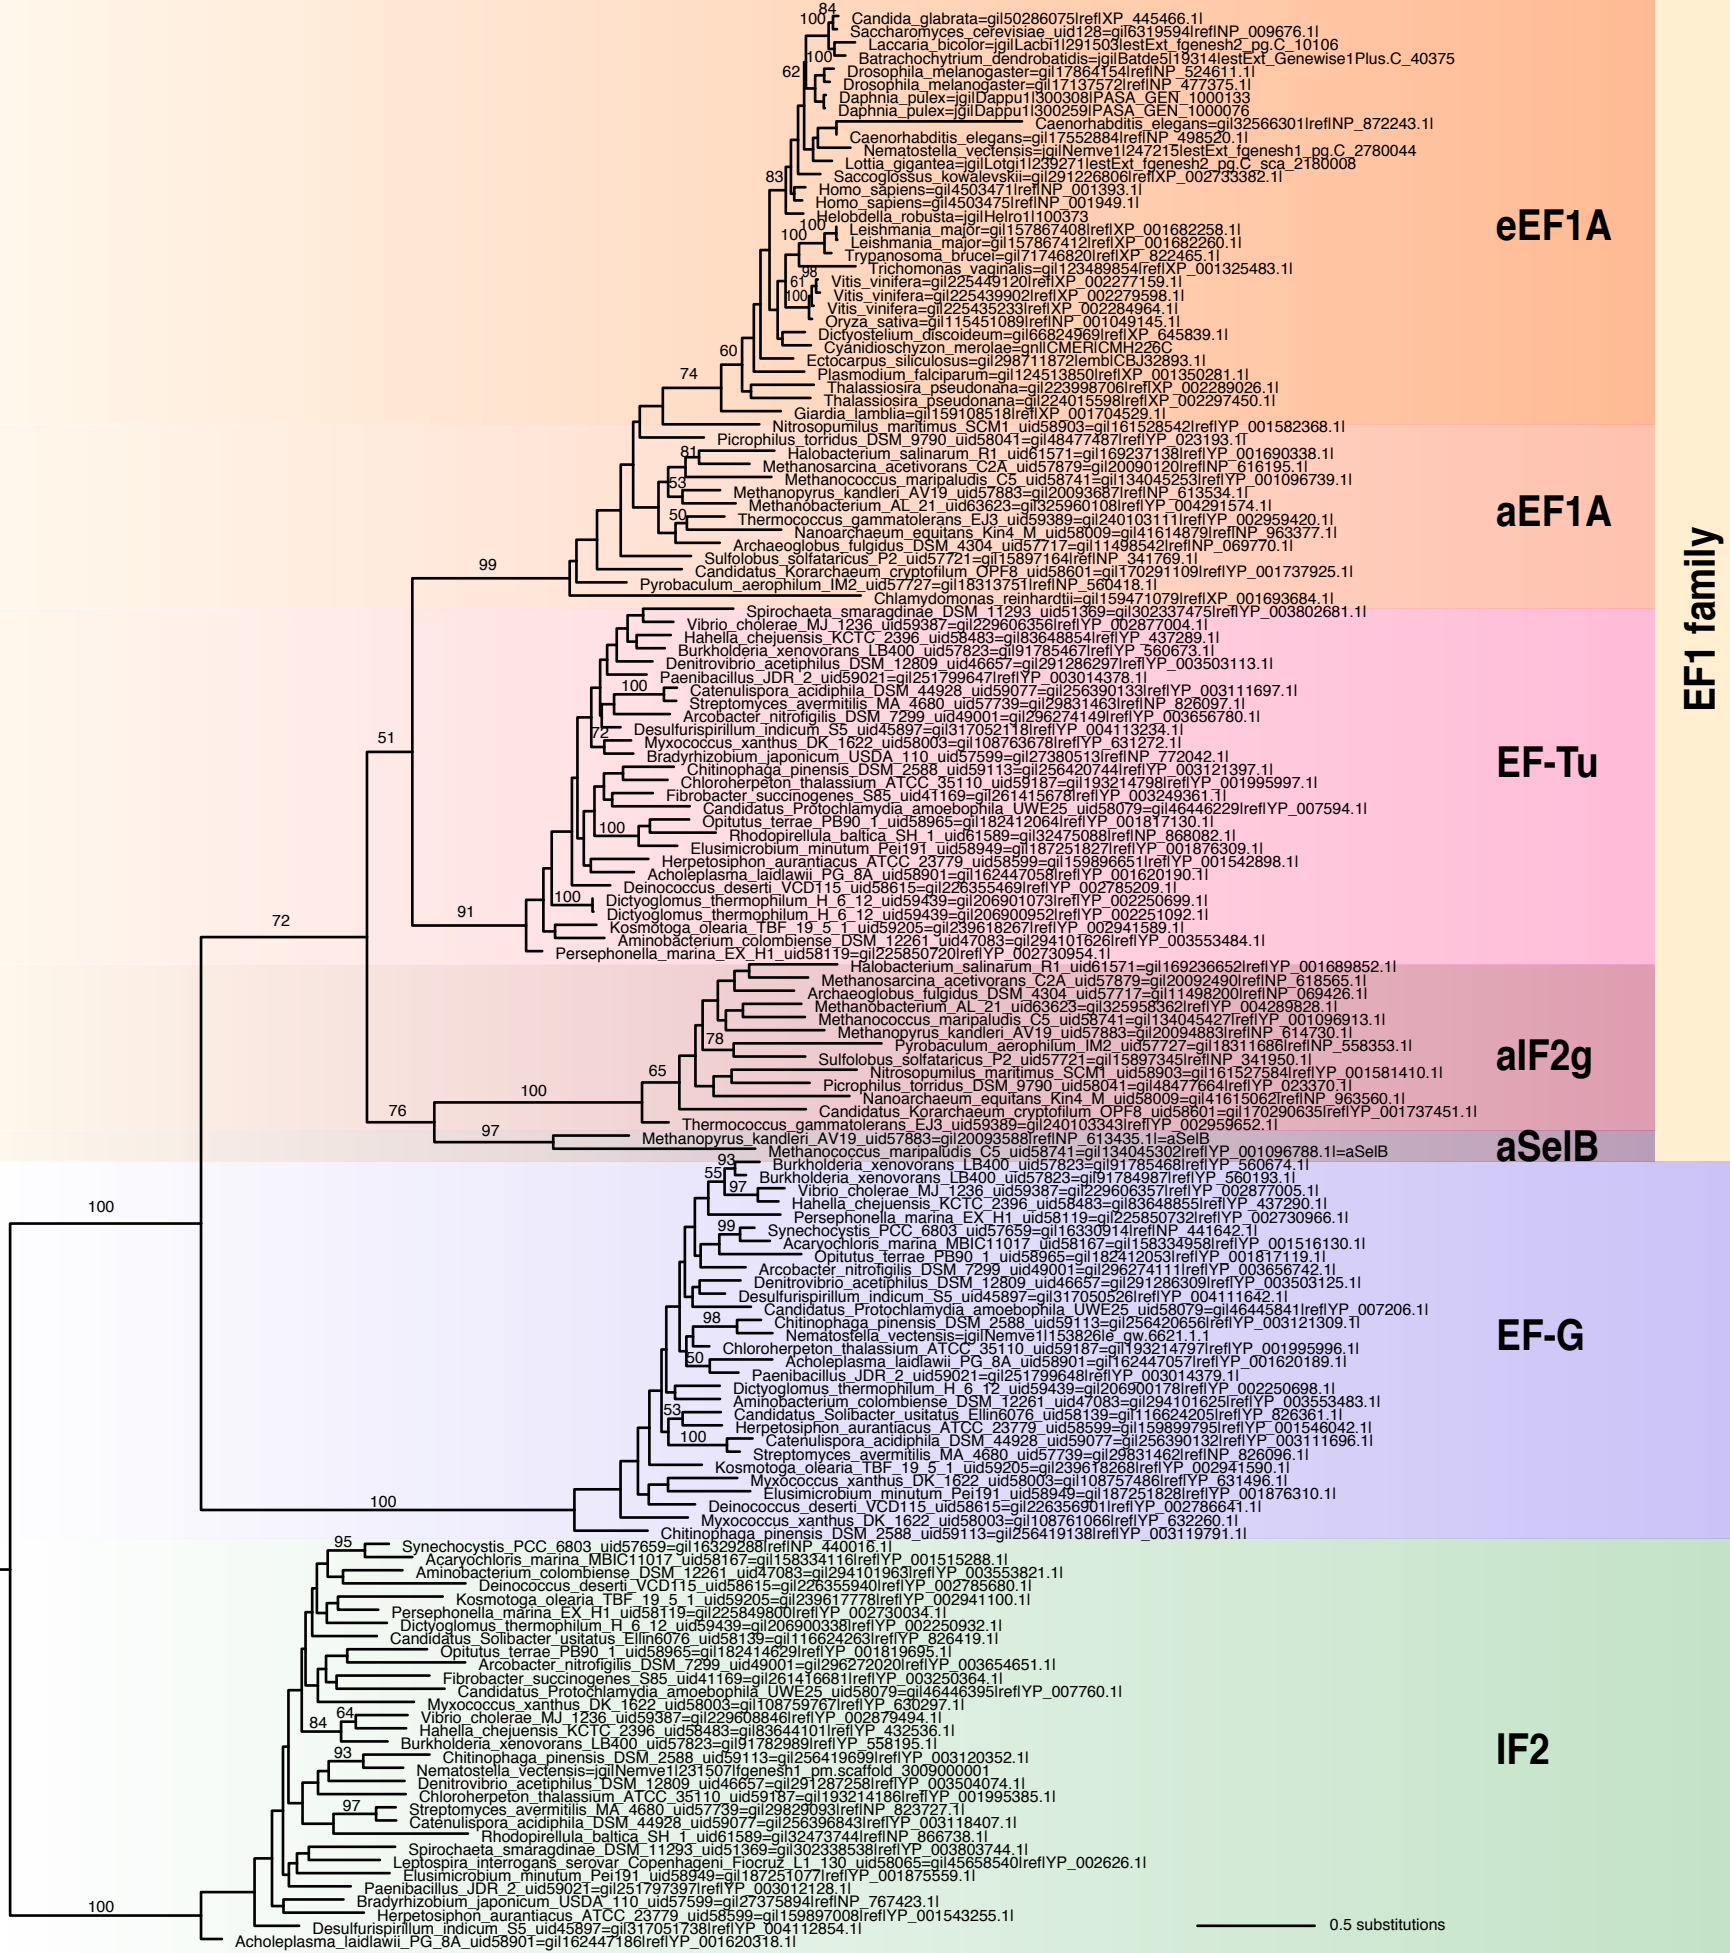

eEF1A

aEF1A

EF-Tu

aIF2g

aSelB

EF-G

IF2

EF1 family

0.5 substitutions
